# Supplementary material for: Smartcrystals for Efficient Dissolution of Poorly Water-Soluble Meloxicam
Source: MDPI journal article supplement (doi:10.3390/pharmaceutics14020245), 2022-01-21
Supplement: s1 [file s1]

# Supplementary Materials: Smartcrystals for Efficient Dissolution of Poorly Water-Soluble Meloxicam

Rita Ambrus, Areen Alshweiat, Piroska Szabó-Révész, Csilla Bartos and Ildikó Csóka

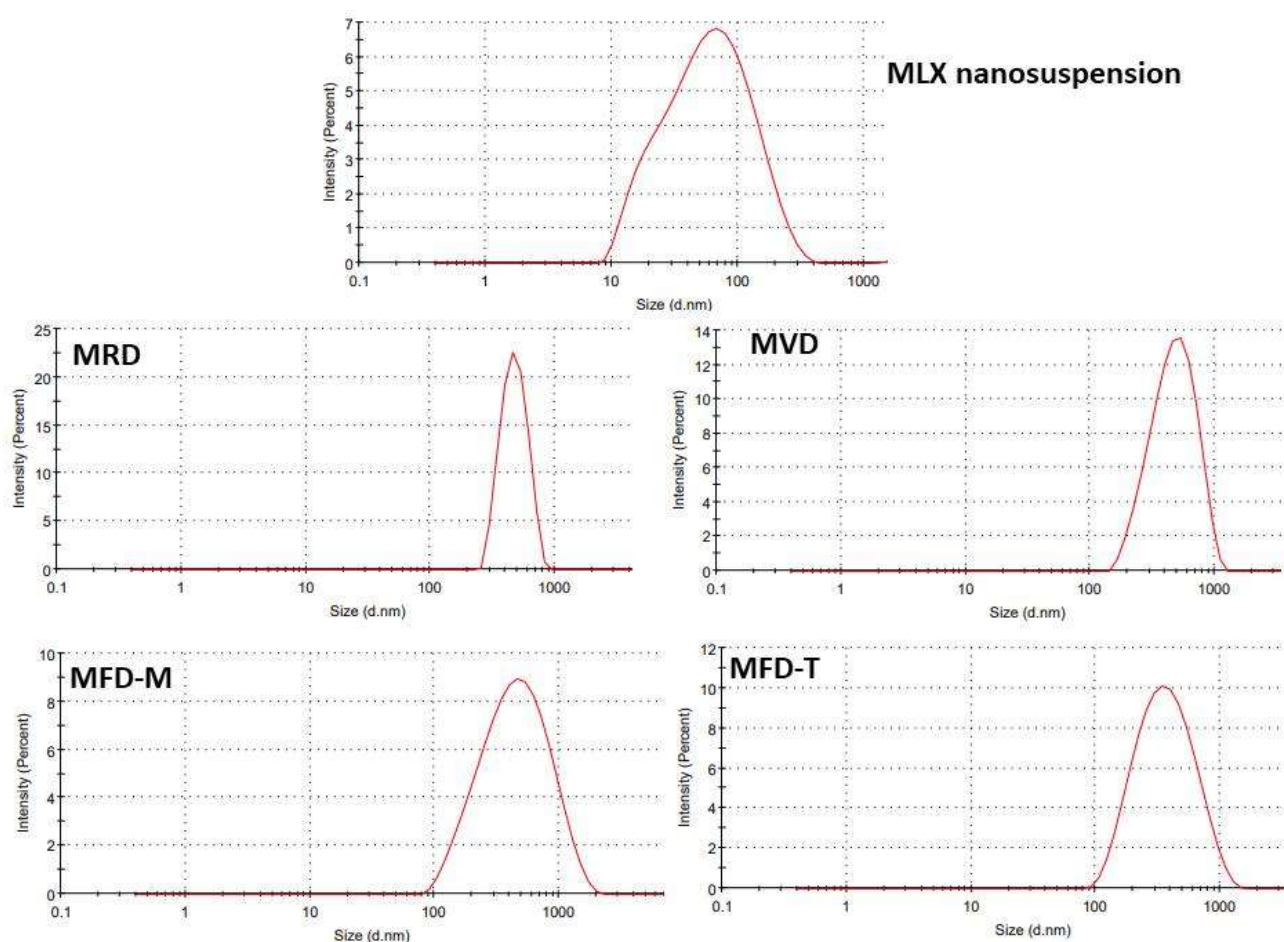

**Figure S1.** MPS of MLX nanocrystals after redistribution in water.

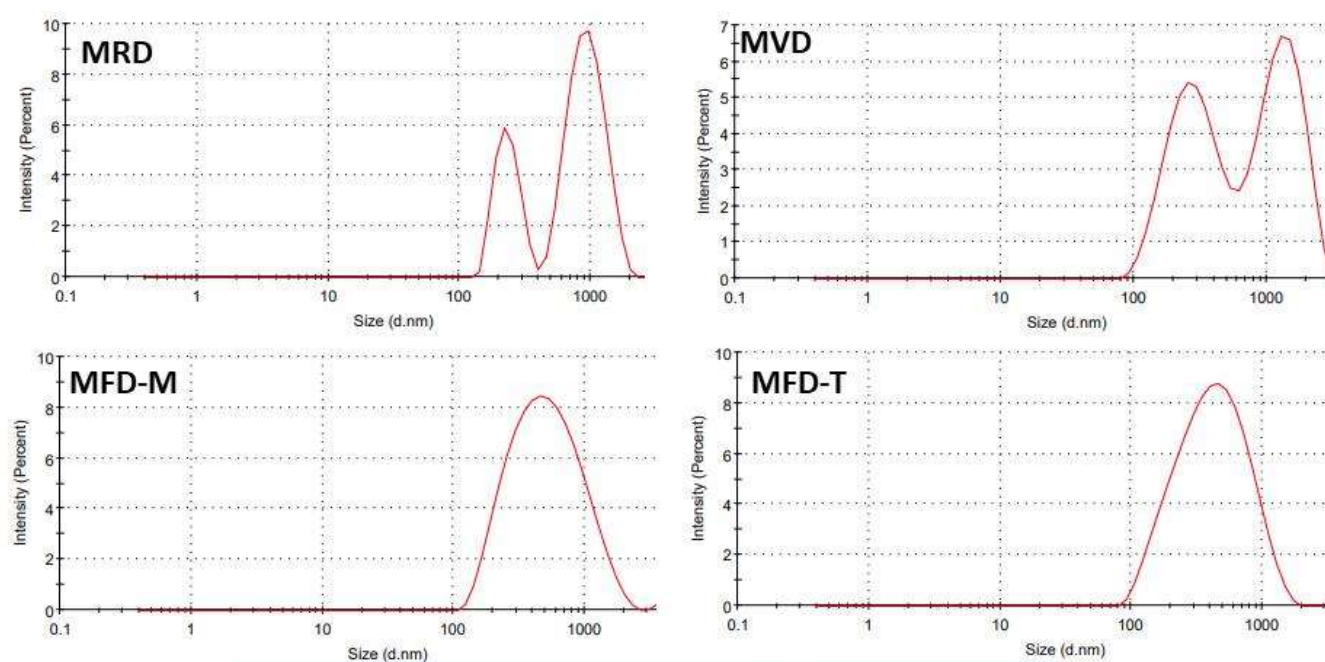

| MPS, ZP and PDI of MLX nanocrystals after redistribution in water (1 month storage) |                |       |
|-------------------------------------------------------------------------------------|----------------|-------|
| Sample                                                                              | MPS (nm)       | ZP    |
| MRD                                                                                 | 804.9 ± 32.12  | -12.6 |
| MVD                                                                                 | 653 ± 17.21    | -16.8 |
| MFD-M                                                                               | 445.57 ± 12.56 | -18.6 |
| MFD-T                                                                               | 357.42 ± 2.47  | -22.9 |

**Figure S2.** MPS, ZP and PDI of MLX nanocrystals after redistribution in water (1-month storage).

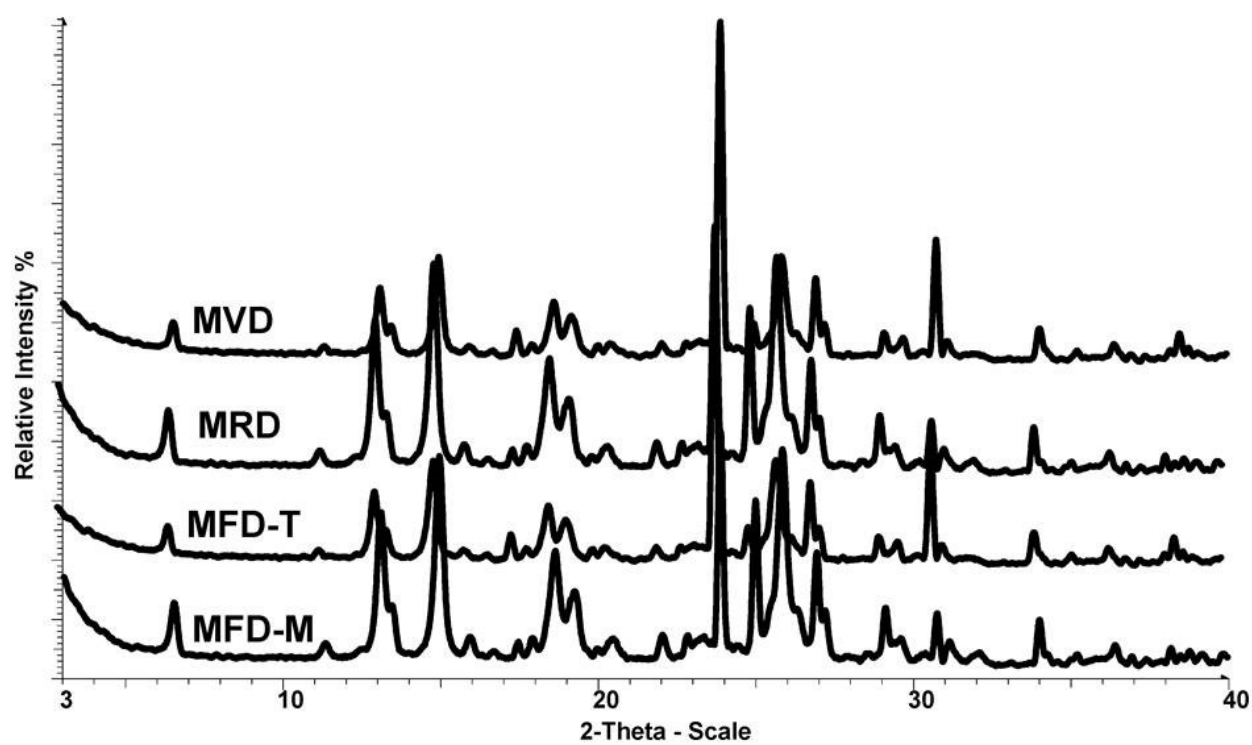

**Figure S3.** XRPD patterns of the samples after dissolution to recrystallized the samples from the media.
